# Supplementary material for: MiRKAT-S: a community-level test of association between the microbiota and survival times
Source: PubMed Central journal article supplement (PMC5299808; doi:10.1186/s40168-017-0239-9), 2017-02-08
Supplement: 40168_2017_239_MOESM1_ESM.pdf [file 40168_2017_239_MOESM1_ESM.pdf]

## Supplementary Material

### MiRKAT-S: A community-level test of association between the microbiota and survival times

Anna Plantinga, Xiang Zhan, Ni Zhao, Jun Chen, Robert R. Jenq, Michael C. Wu

Table S1: Empirical Type I errors when no small sample correction is used, with approximately 25% censoring. Results are based on 5,000 simulated datasets.  $K_u$ ,  $K_{0.5}$ ,  $K_w$ , and  $K_{BC}$  represent results for the unweighted UniFrac kernel, generalized UniFrac kernel with  $\alpha = 0.5$ , weighted UniFrac kernel, and Bray-Curtis kernel, respectively.

| n   | $K_u$  | $K_{0.5}$ | $K_w$  | $K_{BC}$ |
|-----|--------|-----------|--------|----------|
| 100 | 0.0102 | 0.0084    | 0.0286 | 0.0144   |
| 200 | 0.0162 | 0.0130    | 0.0308 | 0.0188   |
| 500 | 0.0218 | 0.0248    | 0.0364 | 0.0254   |

Table S2: Empirical Type I errors with approximately 50% censoring. Results are based on 5,000 simulated datasets.  $K_u$ ,  $K_{0.5}$ ,  $K_w$ , and  $K_{BC}$  represent results for the unweighted UniFrac kernel, generalized UniFrac kernel with  $\alpha = 0.5$ , weighted UniFrac kernel, and Bray-Curtis kernel, respectively.

| n   | $K_u$  | $K_{0.5}$ | $K_w$  | $K_{BC}$ |
|-----|--------|-----------|--------|----------|
| 100 | 0.0546 | 0.0528    | 0.0504 | 0.0512   |
| 200 | 0.0474 | 0.0494    | 0.0522 | 0.0516   |
| 500 | 0.0470 | 0.0450    | 0.0478 | 0.0448   |

Table S3: Empirical Type I errors for small sample sizes ( $n < 100$ ) with approximately 25% censoring. Results are based on 5,000 simulated datasets and permutation p-values were obtained using 1000 permutations.  $K_u$ ,  $K_{0.5}$ ,  $K_w$ , and  $K_{BC}$  represent results for the unweighted UniFrac kernel, generalized UniFrac kernel with  $\alpha = 0.5$ , weighted UniFrac kernel, and Bray-Curtis kernel, respectively.

| n  | Method                     | $K_u$ | $K_{0.5}$ | $K_w$ | $K_{BC}$ |
|----|----------------------------|-------|-----------|-------|----------|
| 25 | No Small Sample Correction | 0.007 | 0.007     | 0.018 | 0.009    |
|    | MiRKAT-S                   | 0.055 | 0.055     | 0.054 | 0.056    |
|    | Permutation                | 0.048 | 0.046     | 0.046 | 0.049    |
| 50 | No Small Sample Correction | 0.006 | 0.004     | 0.016 | 0.005    |
|    | MiRKAT-S                   | 0.058 | 0.051     | 0.045 | 0.051    |
|    | Permutation                | 0.052 | 0.045     | 0.041 | 0.045    |
| 75 | No Small Sample Correction | 0.009 | 0.008     | 0.029 | 0.012    |
|    | MiRKAT-S                   | 0.058 | 0.051     | 0.054 | 0.053    |
|    | Permutation                | 0.053 | 0.048     | 0.051 | 0.049    |

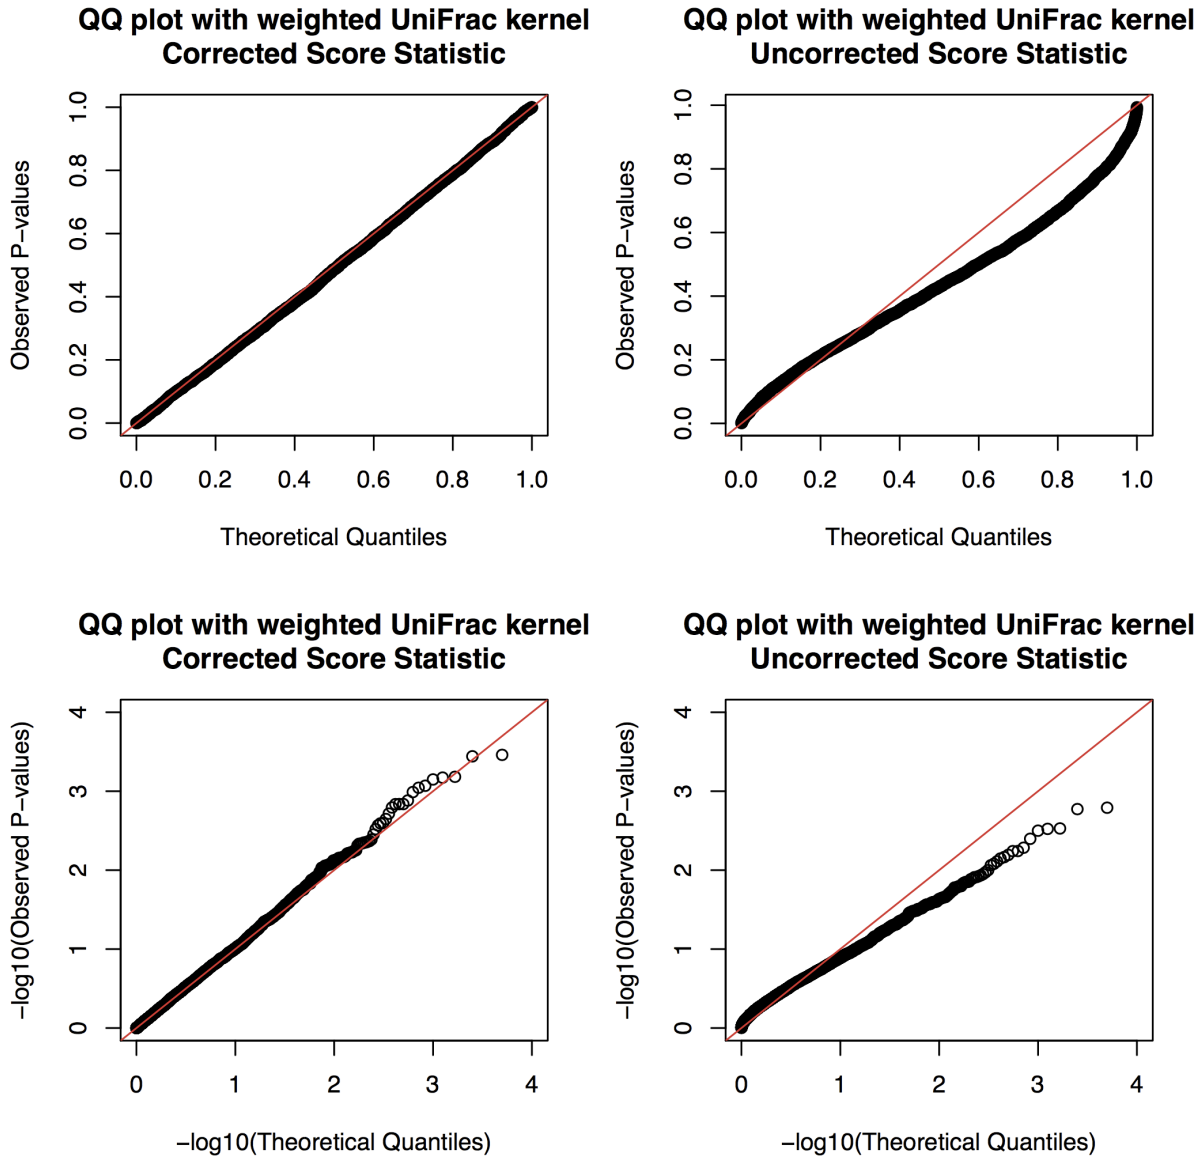

Figure S1: QQ plots demonstrating the performance of the uncorrected and corrected score statistics. The lower two panels display the  $-\log_{10}(\text{P-values})$  for both statistics plotted against the theoretical distribution, showing that MiRKAT-S with the correction behaves as expected, whereas without the correction, the p-values deviate significantly from the theoretical distribution. The upper two panels provide scientific insight regarding p-values generated using the uncorrected statistic. In particular, true p-values lower than 0.2 will tend to be too large when using the uncorrected statistic, whereas true p-values higher than 0.2 will tend to be too small when using the uncorrected statistic. This is consistent with what was observed in the application of MiRKAT-S to the aGVHD data.

### Cluster Effect, Abundant Cluster

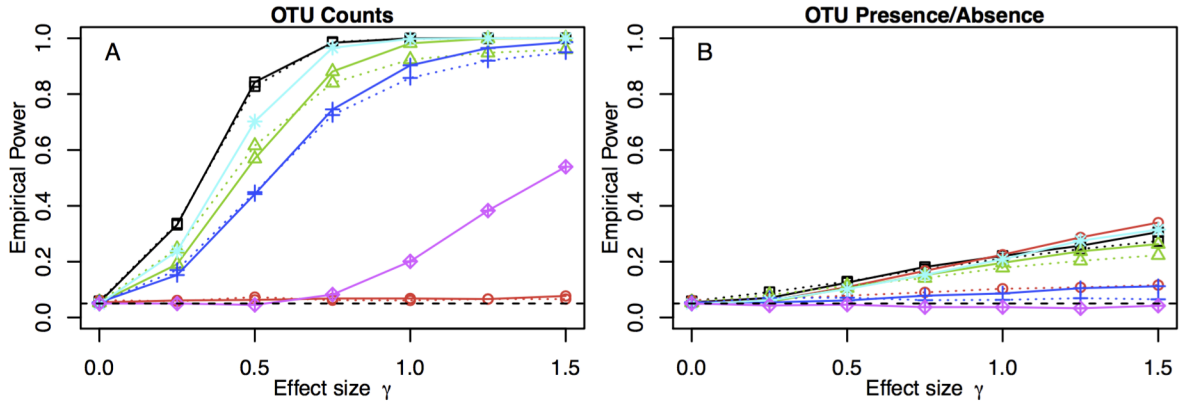

### Cluster Effect, Rare Cluster

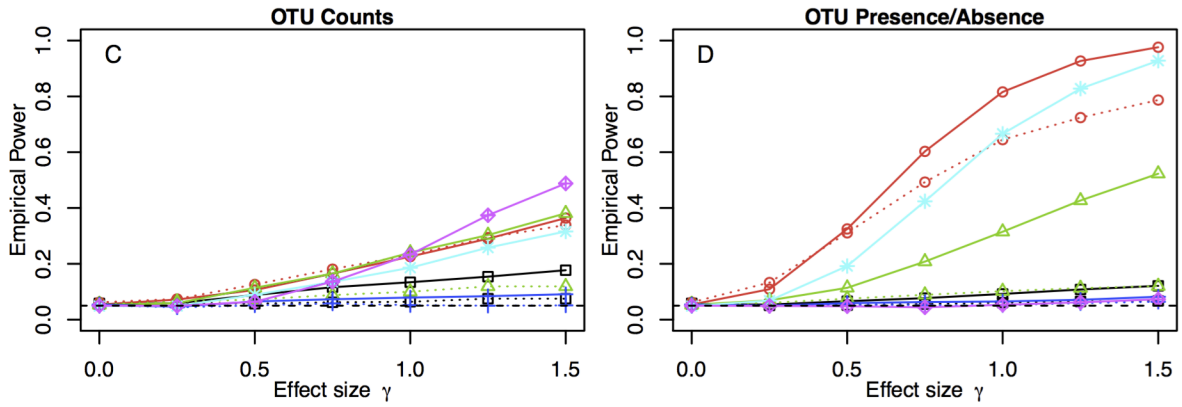

### Unclustered OTU Effect

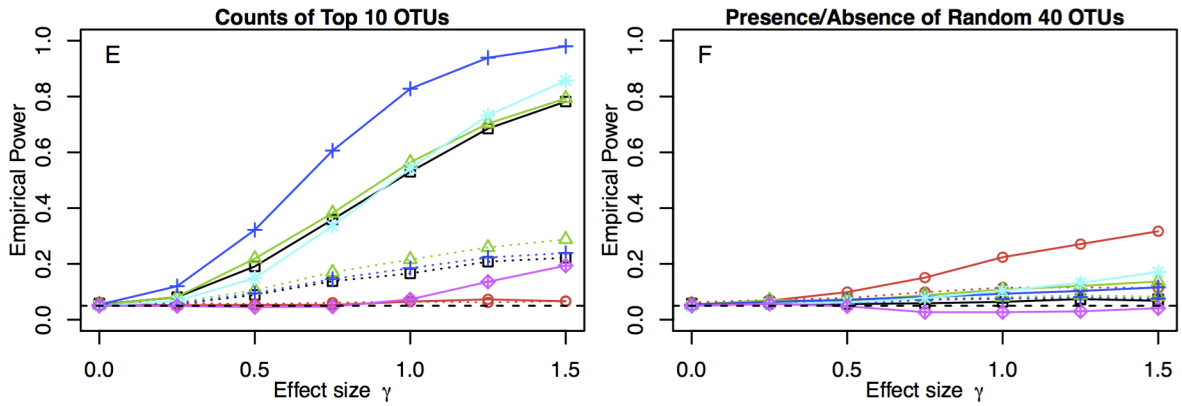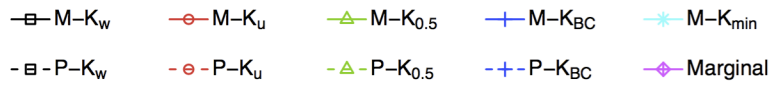

Figure S2: Empirical power including MiRKAT-S as in main text, as well as the minimum p-value test, marginal (OTU-level) association analysis, and PCoA. Power was evaluated in all simulation settings, using a sample size of  $n=100$  and 25% censoring.  $M-K_w$ ,  $M-K_u$ ,  $M-K_{BC}$ , and  $M-K_{0.5}$  represent MiRKAT-S results for the weighted UniFrac kernel, unweighted UniFrac kernel, Bray-Curtis kernel, and generalized UniFrac kernel with  $\alpha = 0.5$ , respectively.  $P-K_w$ ,  $P-K_u$ ,  $P-K_{BC}$ , and  $P-K_{0.5}$  are the corresponding p-values from PCoA using the same set of kernels.  $M-K_{\min}$  uses the minimum FDR-adjusted p-value from MiRKAT-S among all four kernels. “Marginal” refers to the permutation p-value summarizing OTU-level tests of all 856 OTUs.  $\gamma$  is the true effect size for the associated cluster or OTUs. (a) Setting 1; survival is associated with OTU counts in a common cluster containing 19.7% of all reads. (b) Setting 3; survival is associated with the presence or absence of each taxon in a common cluster. (c) Setting 1; Survival is associated with OTU counts in a rare cluster containing 0.9% of all reads. (d) Setting 3; survival is associated with the presence or absence of each taxon in a rare cluster. (e) Setting 2; survival is associated with the ten most common OTUs, regardless of cluster membership. (f) Setting 4; survival is associated with forty OTUs selected at random, regardless of cluster membership.
